# Supplementary material for: Spatially revealed roles for lncRNAs in Drosophila spermatogenesis, Y chromosome function and evolution
Source: PubMed Central journal article supplement (PMC11076287; doi:10.1038/s41467-024-47346-w), 2024-05-07
Supplement: 41467_2024_47346_MOESM1_ESM.pdf [file 41467_2024_47346_MOESM1_ESM.pdf]

## **SUPPLEMENTAL FIGURES AND TABLES**

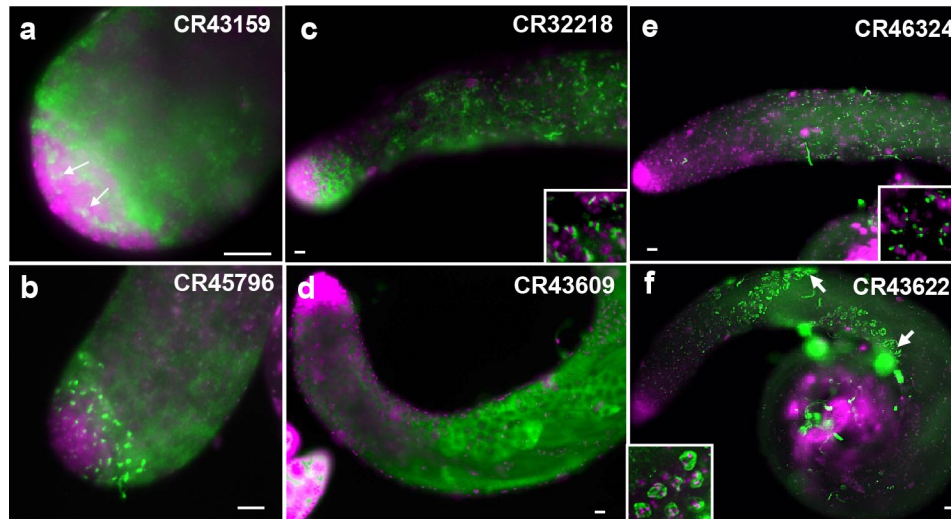

**Supplemental Figure 1. IncRNA expression in the early germline.** **a)** Early membrane associated *CR43159* IncRNA expression in germline stem and/or daughter cells, decreasing and less localized in spermatocytes (arrows indicate GSC/daughter cell interface). **b)** *CR45796* expression primarily in spermatogonia nuclei and then decreasing in early spermatocyte cytoplasm. **c)** Cytoplasmic localization of *CR32218* in spermatogonia and early spermatocytes, then decreasing and relocalized to chromatin during spermatocyte meiotic division (inset). **d)** Cytoplasmic *CR43609* expression in late spermatocytes. **e)** Increasing numbers of *CR46324* nuclear foci in spermatocyte nuclei. **f)** 'Y-loop' expression of *CR43622* in spermatocyte nuclei. Scale bars = 20  $\mu\text{m}$ .

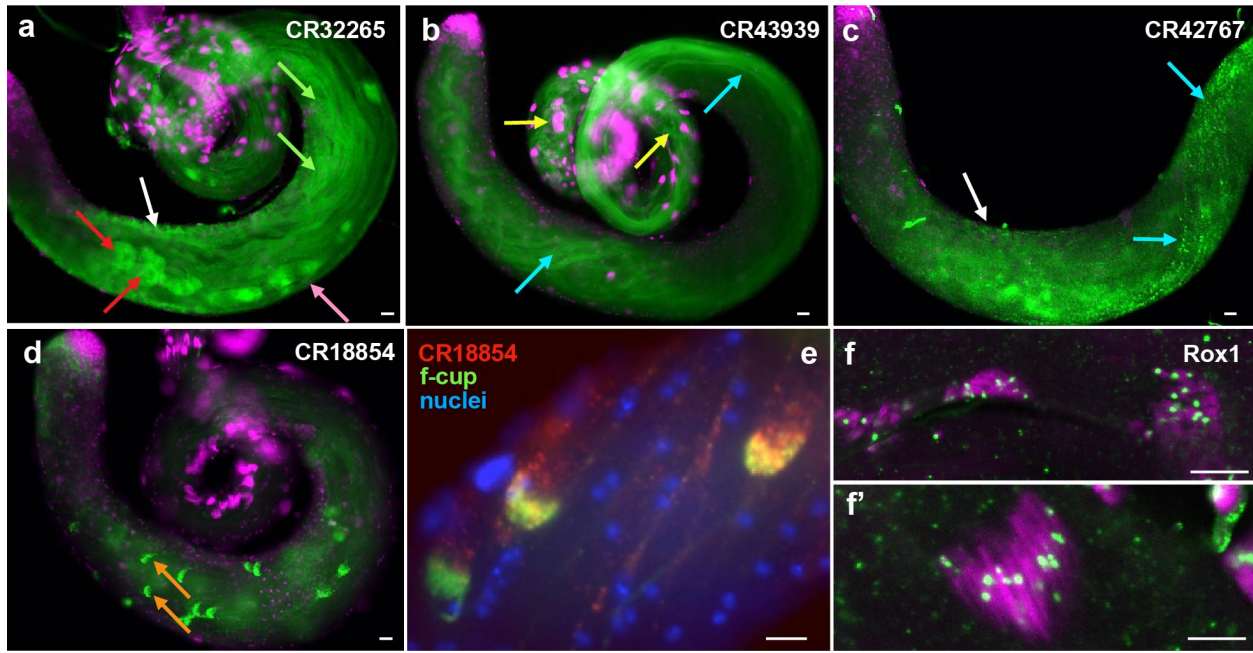

**Supplemental Figure 2. Post-meiotic germline expression patterns.** Panels focus on germline lncRNA expression patterns progressing from earlier to later post-meiotic stages. **a)** *CR32265* expression in round spermatids (white arrow), early elongating spermatids (green arrows), cystic bulge (pink arrow) and waste bags (red arrows). **b)** Spermatid tail expression of *CR43934* in elongated (blue arrows) and coiling spermatids (yellow arrows). **c)** Expression of *CR42767* in puncta along the outside of elongated spermatid tails (blue arrows). White arrow indicates cytoplasmic expression in round spermatids. **d)** Localization of *hpRNA: CR18854* at the ends of elongating spermatid tails (orange arrows). **e)** Double-labeling showing *CR18854* (red) co-localizing with the known cup-localized mRNA *f-cup* (green). DNA stained with DAPI (blue). **f)** Single foci likely representing nascent transcripts of *Rox1* in early elongating and **f'** elongated spermatid nuclei. In a-d, f, f': RNA (green), DNA (magenta). Scale bars = 20  $\mu\text{m}$ .

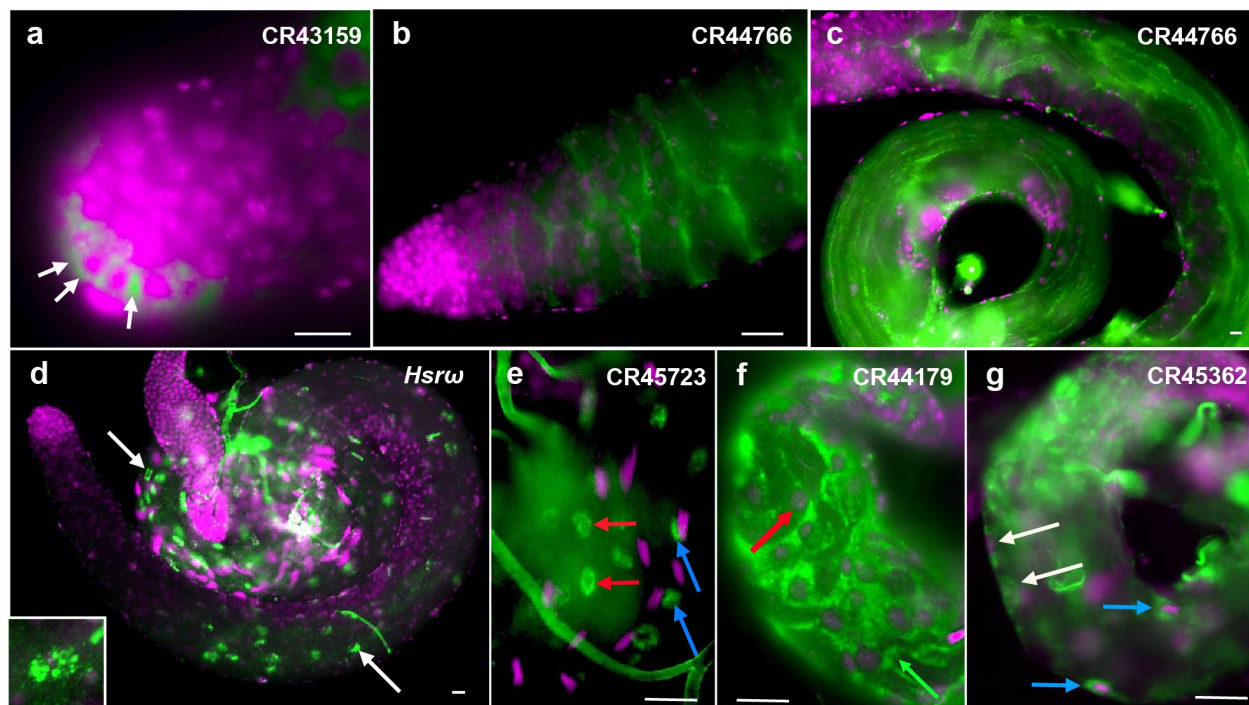

**Supplemental Figure 3. IncRNA expression in cyst cells.** **a)** *CR43159* expression in cyst stem cells. **b)** *CR44766* expression in spermatocyte-associated cyst cells. **c)** Expression of *CR44766* in cyst cells surrounding round, elongating and individualizing spermatids. **d)** *Hsrw* (*CR31400*) accumulation in puncta within cyst cell nuclei. Inset shows a closeup of a single nucleus. **e)** Nuclear localization of *CR45723* in coiling stage head (surrounding spermatid nuclear bundles; blue arrows) and tail (red arrows) cyst cells. **f)** Coiling stage cytoplasmic expression of *CR44179* primarily in tail cyst cells. Red arrows indicate nuclei at spermatid distal ends and green arrows indicate the opposite ends abutting head cyst cells (see diagram in Fig. 1e). **g)** Cytoplasmic expression of *CR45362* in coiling stage head cyst cells (blue arrows) surrounding spermatid nuclear bundles, as well as cytoplasmic expression in terminal epithelial cells (white arrows). Scale bars = 20  $\mu\text{m}$ .

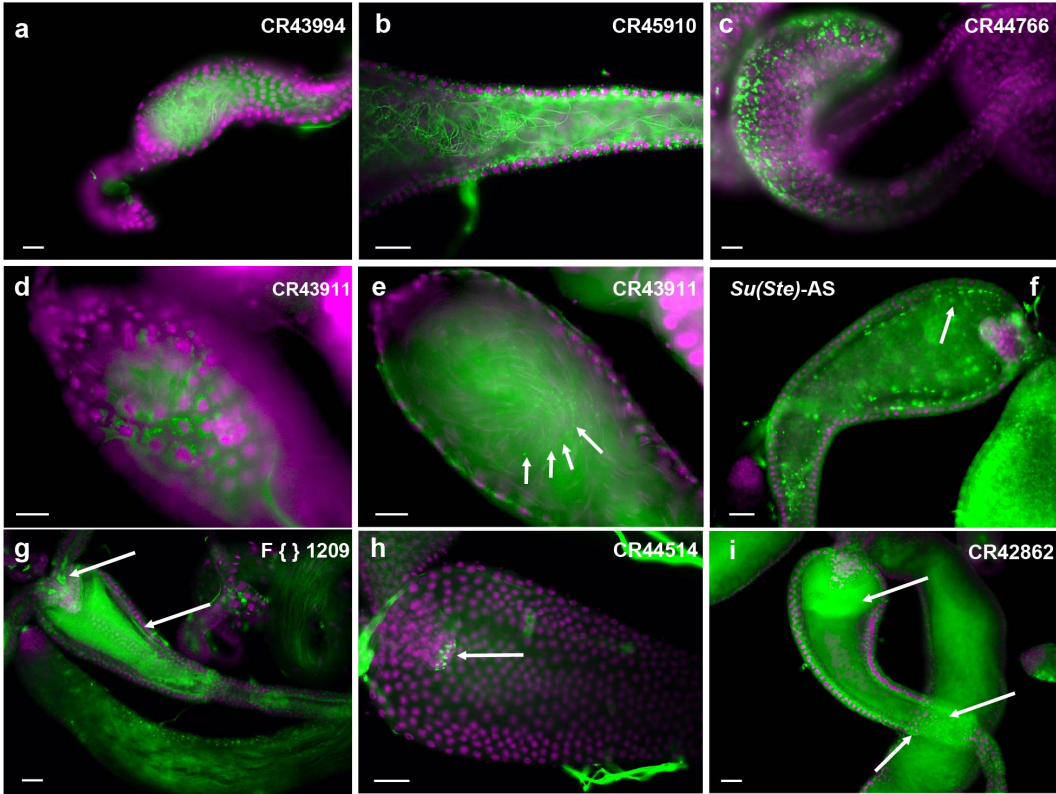

**Supplemental Figure 4. Examples of lncRNA expression in seminal vesicles and ejaculatory ducts.** a) *CR43994* transcripts localized within the seminal vesicle lumen. Much of the signal appears fibrous, perhaps coating mature sperm tails. b) *CR45910* transcripts detected as cytoplasmic puncta in seminal vesical epithelial cytoplasm and coating mature sperm tails. c) *CR44766* localized perinuclearly in a subset of seminal vesicle epithelial cells. d) *CR43911* expressed in perinuclear cytoplasmic puncta in a subset of seminal vesicle cells. e) *CR43911* localized in strings of puncta in the seminal vesicle lumen (arrows). *CR43911* is located just downstream of the sex peptide gene and is also secreted into the accessory gland lumen. f) Localization of *Su(Ste)-AS* transcripts in regularly spaced clumps at the edge of the ejaculatory duct lumen (arrow). g) *F-element 1209* expression in the ejaculatory duct. Transcripts are present in apical epithelial cell cytoplasm and at the junctions with accessory glands (arrows). h) *CR44514* expression in a ring of cells around the entrance to the ejaculatory duct lumen (arrow). i) Varying subcellular localization of *CR42862* in ejaculatory duct epithelial cell cytoplasm and lumen, including luminal enrichment near the duct entrance and varying basal and apical enrichment further down (arrows). Scale bars = 20  $\mu\text{m}$ .

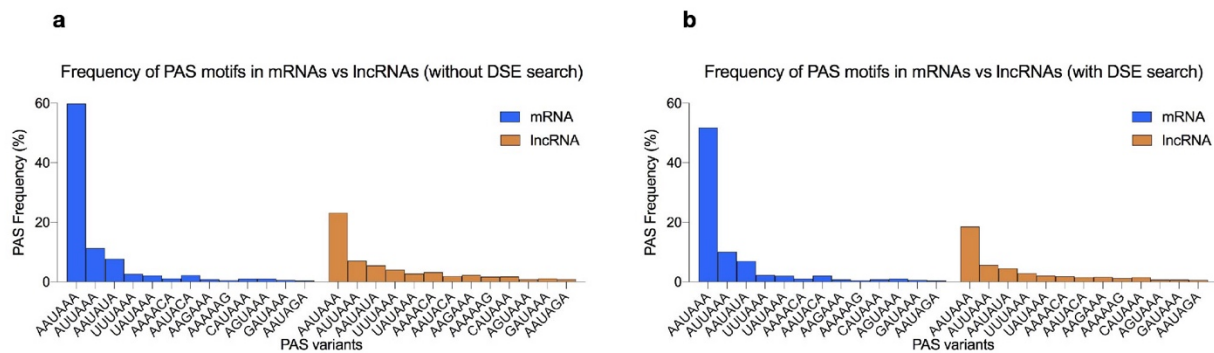

**Supplemental Figure 5. Presence of polyadenylation sequences in coding and lncRNA genes.** **a)** Frequency of presence of shown consensus and degenerate PAS sequences at coding and lncRNA gene 3'ends. **b)** Frequency of presence of shown consensus and degenerate PAS sequences at coding and lncRNA gene 3'ends when a potential downstream sequence element (DSE) was also detected.

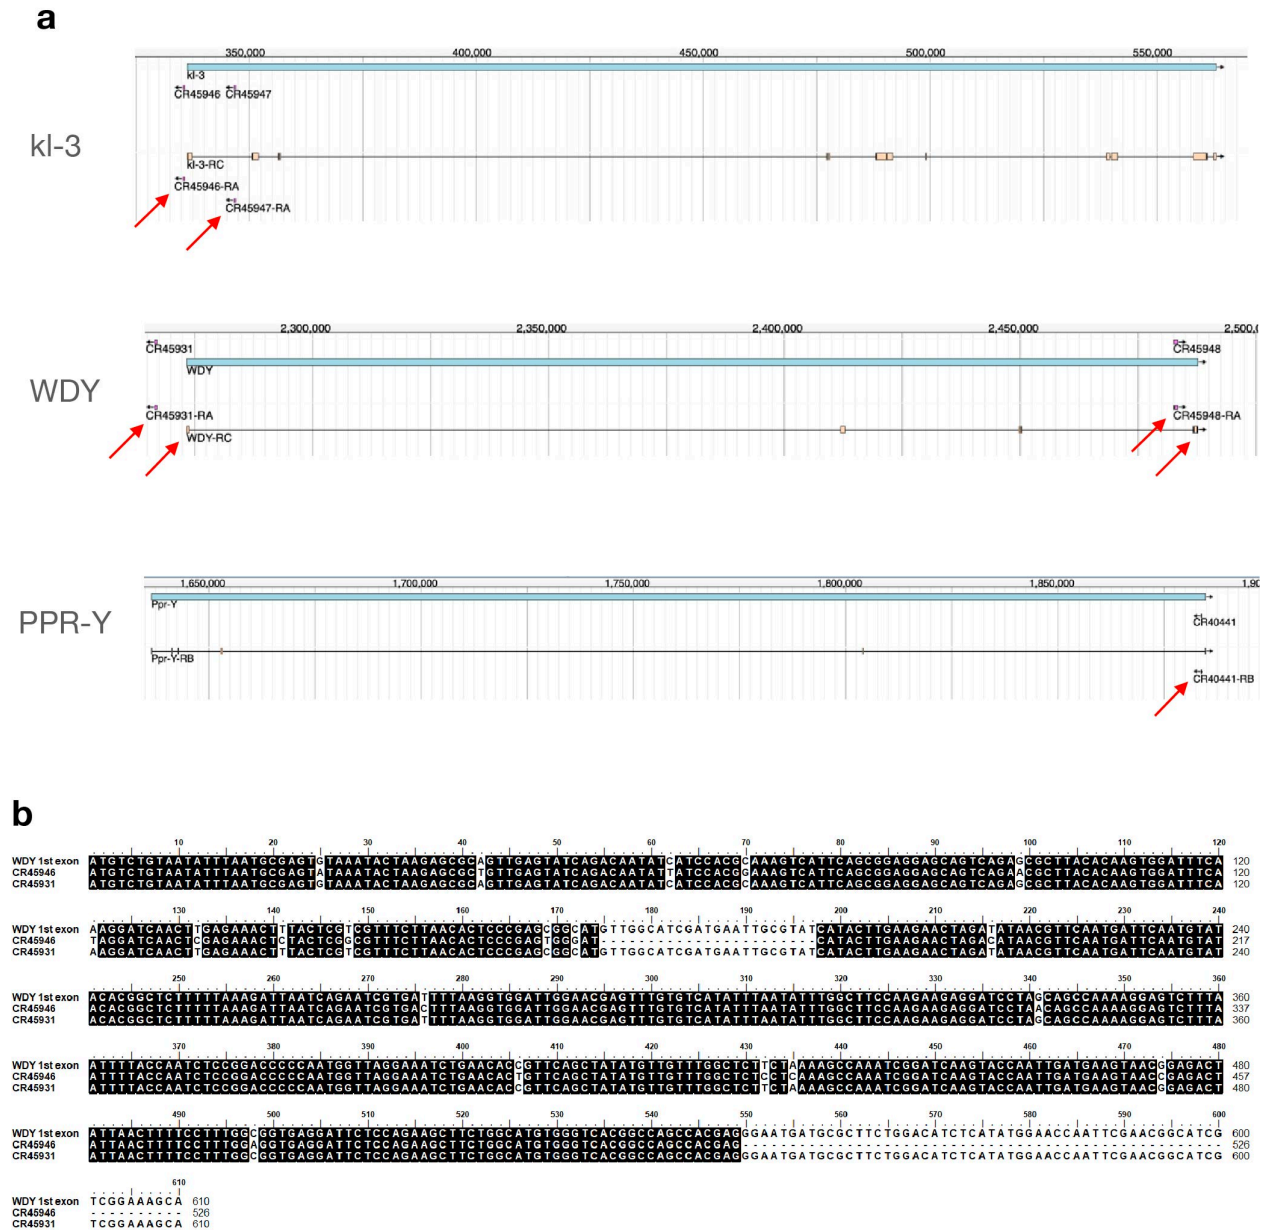

**Supplemental Figure 6. Y chromosome Y-loop lncRNAs.** a) Screen shot from FlyBase genome browser<sup>63</sup> showing the relative locations of three Y chromosome mega-genes and proximal/overlapping lncRNAs. b) Sequence alignments of two lncRNAs with extensive similarity to each other and to *WDY*.

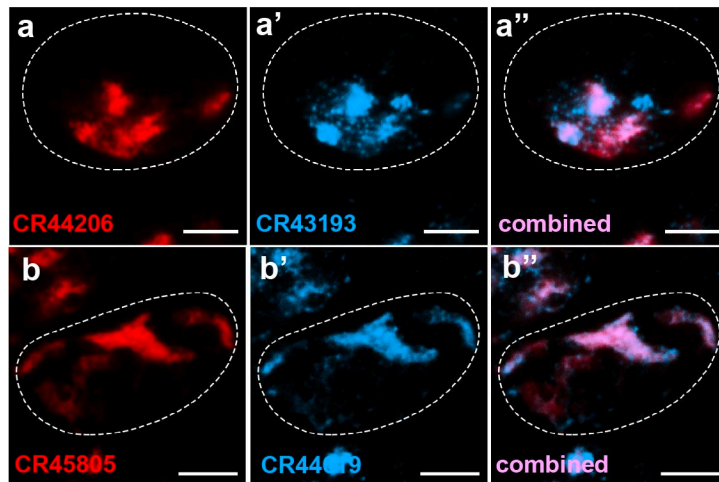

**Supplemental Figure 7. Y-loop lncRNA and mega-gene co-localization. a)** HCR FISH co-localization of *CR44206* and predicted lncRNA interactor *CR43193*. **b)** HCR FISH co-localization of predicted *CR44206* interactors *CR45805* and *CR44619*. Scale bars = 5  $\mu$ m.



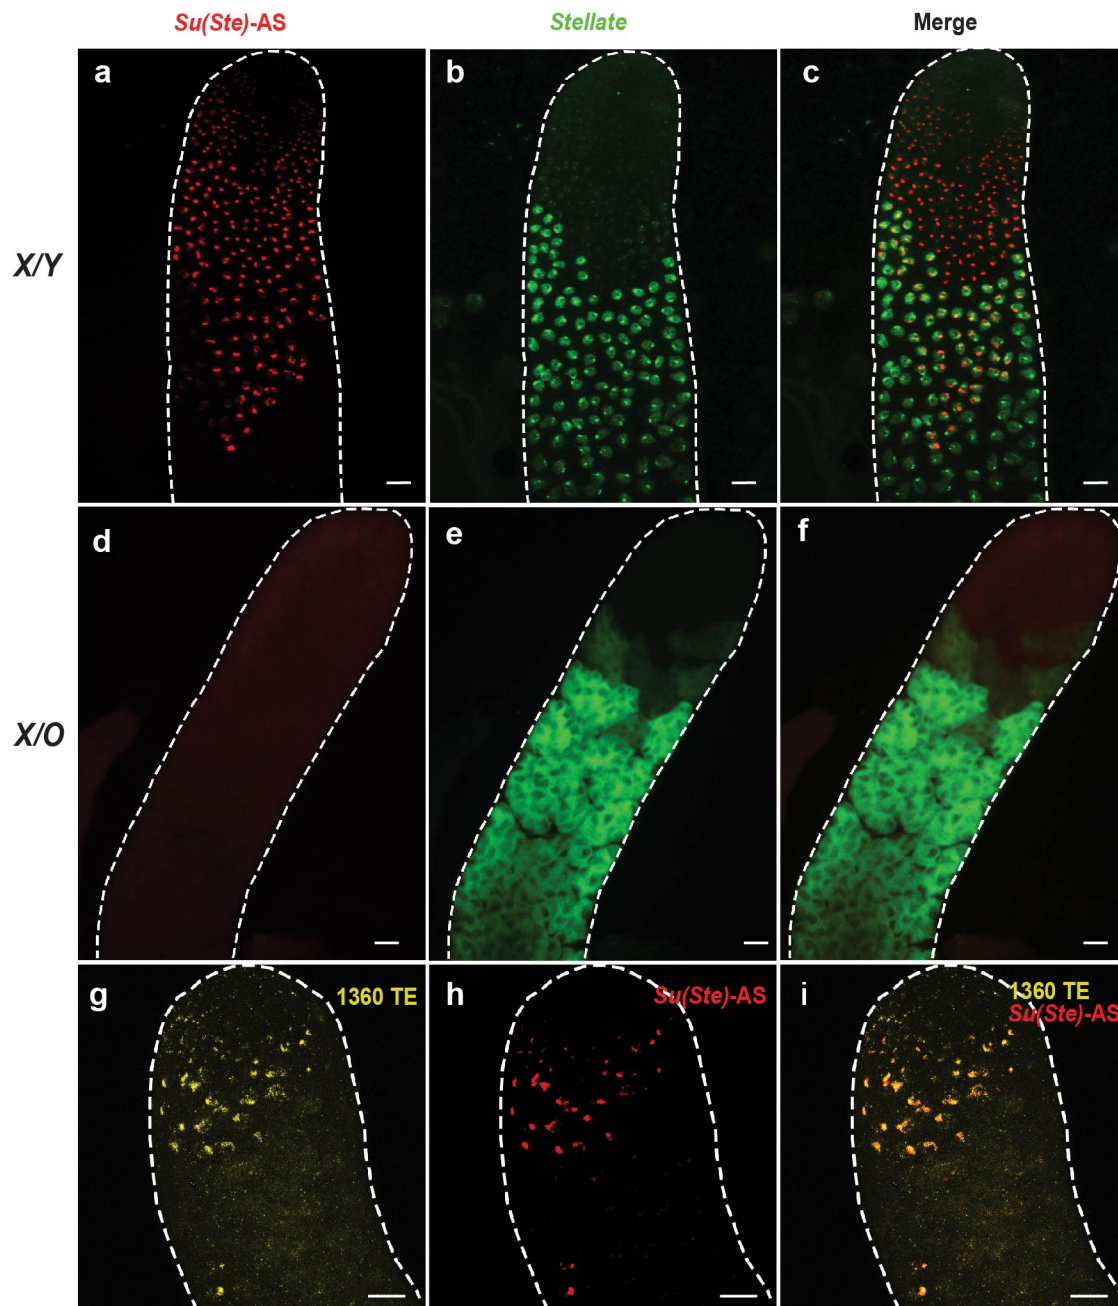

**Supplemental Figure 8. *Su(Ste)*-AS expression details and controls.** a-c) XY testes express both *Su(Ste)*-AS and *Ste*. d-f) Absence of *Su(Ste)*-AS transcripts (red) and increased cytoplasmic expression of *Ste* transcripts (green) in testes dissected from XO (no Y chromosome) males. Probes directed against the *hoppe/1360* TE and downstream regions of the *Su(Ste)*-AS transcript generate nearly identical patterns. Scale bars = 20  $\mu$ m.

**Supplemental Table 1. LncRNA genes 3' end sequences and gene-specific primers used for RT-PCR in Figure 1h.**

|    | Gene    | Sequence                                             |
|----|---------|------------------------------------------------------|
| 1  | CR32690 | CATCCCAAAG <u>AATAAAAA</u> ACATCGATTAATTGAGCT        |
|    |         | TCAACGATCCAAATCAACGCA                                |
| 2  | CR42767 | CATCGCAAAG <u>AATAAAAA</u> ACATCGATCAGTTGAACT        |
|    |         | TTCGGTGTCTTCAGTGTGCG                                 |
| 3  | CR42850 | TATAAACCAATA <u>AATAAAA</u> TATAAATTTGTATATGC        |
|    |         | TGGCTAACTGATGGCTGGTG                                 |
| 4  | CR9284  | TCTACGTTGATTA <u>ATTAA</u> AGACTTTAATAAGCGTC         |
|    |         | CGAATCCTAGTCAATCGTTATCC                              |
| 5  | CR43634 | AACTATTA <u>AA</u> ACTGAATTTATA <u>AA</u> CGATACTCGT |
|    |         | TCTTTCCAAGCTAAGCGAAAT                                |
| 6  | CR43152 | GCCCAAAATATA <u>AAATAAA</u> TGTTACTCCGATCTG          |
|    |         | TGCACTCGAAACTAACTGGGA                                |
| 7  | CR45535 | ACACAATCCCATTCAGTGATACTGATTGATACTTC                  |
|    |         | TTTGTATACCAGATGGGGTGCAGTTA                           |
| 8  | CR45956 | CGGGATTTACTACATGATGCTCCAAGTCGACCTG                   |
|    |         | AATCAGATGCGGGCACTAAGCATCT                            |
| 9  | CR44206 | GAATCGACAGGAATTCGGCGAGTCAAAGAGGAGCT                  |
|    |         | AGAGAATGATAAGGGTACGAATGCA                            |
| 10 | CR34044 | TAATTTTGAGCATGGATCTGTTTTGGGCTGCCACT                  |
|    |         | AATCTACGGATTAGACTGCACCTCT                            |
| 11 | CR43961 | TTGGCCATACCGATAACTAAATCTTTTAGCTAGC                   |
|    |         | TTATCCGGTATGGCCAAGTTGA                               |
| 12 | CR44264 | TCACTTAATTAACAACGGAATTTTTTATACAAGAT                  |
|    |         | TCATGCTGACCCCAAGTTGT                                 |

PAS motifs, where present, are underlined. Genes 1-6 were chosen from genes found to be highly expressed by RNAseq and snSEQ, while genes 7-12 were chosen from lncRNA genes previously deemed very low or not detected. All 12 lncRNAs yielded strong signals via FISH analyses (Fly-FISH). Gene-specific primers used for reverse transcription are also provided.

**Supplemental Table 2. Oligonucleotide sequences used for HCR FISH.**

| Gene       | Target site              | Initiator | start positions | Split probe 1                                  | Split probe 2                                  |
|------------|--------------------------|-----------|-----------------|------------------------------------------------|------------------------------------------------|
| CR44206    | 1st exon                 | B1        | 1               | GAGGAGGGCAGCAACGGAACGGAGTCTCGCAGCGAAATGAATCC   | TTCAGCCCGCTCAATCAACCTGACACTAGAAAGTCTTCCCTTTAGC |
| CR44206    | 1st intron               | B2        | 1809            | CCTCGTAAATCCTCATCAAACCTGTGTTCTGTGTTCTCGGTGCTC  | TGTGTTCTGAGTCTGCTTCTGTGAAATCATCCAGTAAACCGCC    |
| CR44206    | 3rd exon                 | B3        | 15406           | GTCCCTGCCTCTATATCTTTGTCGATTCATGGGTATTGGTTGA    | AGTCCCTCTTTGACTCGCCGAATCTTCCACTCACTTTAACCCG    |
| CR44619    | 1st exon                 | B2        | 140             | CCTCGTAAATCCTCATCAAACCTCGCTCTCTTTGCCCTTTTACG   | TCATGTTAACTGGTAGCTCTCCCTAAATCATCCAGTAAACCGCC   |
| CR45805    | N                        | B1        | 89              | GAGGAGGGCAGCAACGGAACCTCTCTCTCAAAAAGAGCGTGCGC   | TCTCTCTCTCTCTCTCTCTCTCATAGAAGAGTCTTCCCTTTAGC   |
| CR43193    | exon/1st intron junction | B1        | 558             | GAGGAGGGCAGCAACGGAACGTGCAAGCTGCATGAATTACGAG    | TTTTCCCGGACCTGTCTTTGTGAGAAAGTCTTCCCTTTAGC      |
| CR45931    | N                        | B1        | 550             | GAGGAGGGCAGCAACGGAAGAGATGTCAGAAAGCGCATCATCC    | ACGATGCCGTTCGAATGGTTCATAAATCATCCAGTAAACCGCC    |
| CR45931    | N                        | B2        | 550             | CCTCGTAAATCCTCATCAAAGAGATGTCAGAAAGCGCATCATCC   | ACGATGCCGTTCGAATGGTTCATAAATCATCCAGTAAACCGCC    |
| Ppr-y      | 5th exon                 | B1        | 167702          | GAGGAGGGCAGCAACGGAATTCGCTCATCTAATCGCAAAGTG     | TTCCCTTGTTCGAGTCGCAATGTGTAAGAGTCTTCCCTTTAGC    |
| Ppr-y      | 6th exon                 | B1        | 248273          | GAGGAGGGCAGCAACGGAACGGTCTATTCTACAAGAAGTT       | CATCGTGTGGTAAGGATGTCATAGCTAGAAAGTCTTCCCTTTAGC  |
| Ppr-y      | 1st exon                 | B1        | 17              | GAGGAGGGCAGCAACGGAAGGCTCTGTACTTCGGAATTATTTA    | CTGGGTAATAAATCTCATCCACAATAGAAGAGTCTTCCCTTTAGC  |
| Ppr-y      | 1st exon                 | B1        | 85              | GAGGAGGGCAGCAACGGAAGCTTTCAATCAAGGAACGGTTAAT    | CACCACGATGAACGTGTTTAAATATAGAAGAGTCTTCCCTTTAGC  |
| kl-3       | 1st exon                 | B2        | 150             | CCTCGTAAATCCTCATCAAAGCAGCAGCTTTAATGTTGCGCG     | TCTTGGTCACTTACACTAGTCTCCAAATCATCCAGTAAACCGCC   |
| kl-3       | 1st exon                 | B2        | 976             | CCTCGTAAATCCTCATCAAACAAAGTCTCTACATCGGGTGTATCT  | CATACCGCGCAATGGACCAATTAATATCATCCAGTAAACCGCC    |
| kl-3       | 1st intron               | B3        | 9255            | GTCCCTGCCTCTATATCTTTAATCATCTGCTATCCGATTCGAGA   | ATACTCACCAGGATGAATGGCAAGATTCACCTCACTTTAACCCG   |
| kl-3       | 1st intron               | B3        | 8853            | GTCCCTGCCTCTATATCTTTAAGTTAAGATCGGACCCGACCTTA   | AAGCTTACGTACGACAGATGCTTATCCACTCAACTTTAACCCG    |
| Ste        | 2nd exon                 | B1        | N/A             | TCCGCAGCATCGAGAAGAATGTCAAATCATCCAGTAAACCGCC    | CCTCGTAAATCCTCATCAAACGGGAAGTGGGCCGCAACATCGCT   |
| Ste        | 2nd exon                 | B1        | N/A             | CTGCCAGCTGTATCAGACTTCGGAAATCATCCAGTAAACCGCC    | CCTCGTAAATCCTCATCAAATGAAGTGTCTTTACACCGTGGG     |
| Ste        | 2nd exon                 | B1        | N/A             | AGTGGATCTTGACGGTTGACTTGCCTAAATCATCCAGTAAACCGCC | CCTCGTAAATCCTCATCAAACCAATACAGCCCTGAGGCCACTTGGC |
| Ste        | 2nd exon                 | B1        | N/A             | GGGTGTTCTGCCTATCACAGGAGATAAATCATCCAGTAAACCGCC  | CCTCGTAAATCCTCATCAAATGGGACAGATCCAAATCTCCT      |
| Ste        | 2nd exon                 | B1        | N/A             | GCAAATATTTTCGGTGCATAGCAATAAATCATCCAGTAAACCGCC  | CCTCGTAAATCCTCATCAAACAGCCGCTCTGACCTGATGTAT     |
| Ste        | 2nd exon                 | B1        | N/A             | GGGCGTAAATCATCGCGTACCCTTAAATCATCCAGTAAACCGCC   | CCTCGTAAATCCTCATCAAATTTTTCATCGCCGTACAACAAGCCG  |
| Ste        | 2nd exon                 | B1        | N/A             | AGGAATATCGATCACCGGTTCAGAAATCATCCAGTAAACCGCC    | CCTCGTAAATCCTCATCAAAGATCAGTCCAGTATCTCGTGAAA    |
| Ste        | 2nd exon                 | B1        | N/A             | ACTCCAAGCCCATCTGGTGAACGTAATCATCCAGTAAACCGCC    | CCTCGTAAATCCTCATCAAATCTGCAGTAGTGGTGGGCGAG      |
| Su(Ste)-S  | Y-chr specific region    | B2        | N/A             | CCTCGTAAATCCTCATCAAAGCAATGCGCTGTATCAGTTTTAG    | AGAAGATGTCCGGGAAGTGGGCTCAAAATCATCCAGTAAACCGCC  |
| Su(Ste)-S  | Y-chr specific region    | B2        | N/A             | CCTCGTAAATCCTCATCAAACGGTCTCAAGTTCGGCAGCTGGGTT  | TTACTTACCCTGGGTCGTCAGGGGAAATCATCCAGTAAACCGCC   |
| Su(Ste)-S  | Y-chr specific region    | B2        | N/A             | CCTCGTAAATCCTCATCAAAGAACAATTGAAGCGCTTGACTTCG   | AGTAAAAAATCAGTCACTCCCTAGAAATCATCCAGTAAACCGCC   |
| Su(Ste)-AS | Y-chr specific region    | B3        | N/A             | GTCCCTGCCTCTATATCTTTGGTAACTACCTGGGTATAAATAA    | GCAAAGCATACTTTTCGTTAATAGTTTCCACTCACTTTAACCCG   |
| Su(Ste)-AS | Y-chr specific region    | B3        | N/A             | GTCCCTGCCTCTATATCTTTGGTCAATCAAGCACTCATTCGAGT   | TGGTTCAAAGTTCGGTCAAGCTTCCACTCACTTTAACCCG       |

Each line contains two sequences (split probe 1/2) that target adjacent gene sequences to generate amplified signals. Target sites and starting positions on target sequences are also indicated, along with HCR initiator sequences used for amplification.
